# Supplementary material for: Correlation between the Level of Social Distancing and Activity of Influenza Epidemic or COVID-19 Pandemic: A Subway Use-Based Assessment
Source: MDPI journal article supplement (doi:10.3390/jcm10153369), 2021-07-29
Supplement: s1 [file s1]

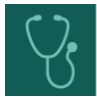

Article

# Supplementary Material: Correlation between the Level of Social Distancing and Activity of Influenza Epidemic or COVID-19 Pandemic: A Subway Use-Based Assessment

Hye Seong, Jin-Wook Hong, Hak-Jun Hyun, Jin-Gu Yoon, Ji-Yun Noh, Hee-Jin Cheong, Woo-Joo Kim, Jae-Hun Jung and Joon-Young Song

**Table S1.** Weekly trend of Subway use-based social distancing score (S-SDS), influenza-like illness (ILI) during three flu seasons.

| 2017–2018 Season |      |      |      |      |      |       |       |       |       |       |       |       |       |       |       |       |       |       |       |       |       |       |       |       |       |       |       |       |       |       |       |       |
|------------------|------|------|------|------|------|-------|-------|-------|-------|-------|-------|-------|-------|-------|-------|-------|-------|-------|-------|-------|-------|-------|-------|-------|-------|-------|-------|-------|-------|-------|-------|-------|
| Week             | 41   | 42   | 43   | 44   | 45   | 46    | 47    | 48    | 49    | 50    | 51    | 52    | 1     | 2     | 3     | 4     | 5     | 6     | 7     | 8     | 9     | 10    | 11    | 12    | 13    | 14    | 15    | 16    | 17    | 18    | 19    | 20    |
| S-SDS            | 1.70 | 1.78 | 1.85 | 1.80 | 1.81 | 1.81  | 1.79  | 1.79  | 1.80  | 1.82  | 1.96  | 1.98  | 1.72  | 1.78  | 1.82  | 1.70  | 1.77  | 1.80  | 1.62  | 2.00  | 1.84  | 1.86  | 1.88  | 1.86  | 1.89  | 1.86  | 1.80  | 1.75  | 1.83  | 1.87  | 1.81  | 1.85  |
| ILI              | 3.80 | 4.20 | 4.10 | 5.20 | 5.30 | 6.30  | 7.70  | 11.40 | 19.00 | 30.70 | 53.60 | 71.80 | 72.10 | 69.00 | 59.60 | 43.60 | 35.30 | 31.70 | 30.70 | 18.80 | 15.10 | 11.70 | 9.80  | 8.00  | 7.20  | 6.20  | 6.80  | 5.80  | 7.60  | 6.20  | 6.10  | 6.00  |
| 2018–2019 Season |      |      |      |      |      |       |       |       |       |       |       |       |       |       |       |       |       |       |       |       |       |       |       |       |       |       |       |       |       |       |       |       |
| Week             | 41   | 42   | 43   | 44   | 45   | 46    | 47    | 48    | 49    | 50    | 51    | 52    | 1     | 2     | 3     | 4     | 5     | 6     | 7     | 8     | 9     | 10    | 11    | 12    | 13    | 14    | 15    | 16    | 17    | 18    | 19    | 20    |
| S-SDS            | 1.80 | 1.82 | 1.85 | 1.83 | 1.80 | 1.86  | 1.84  | 1.79  | 1.74  | 1.83  | 1.96  | 1.99  | 1.71  | 1.80  | 1.80  | 1.84  | 1.74  | 1.76  | 1.90  | 1.89  | 1.83  | 1.85  | 1.85  | 1.84  | 1.82  | 1.82  | 1.78  | 1.73  | 1.80  | 1.94  | 1.82  | 1.83  |
| ILI              | 3.70 | 3.80 | 4.90 | 5.70 | 7.80 | 10.10 | 13.20 | 19.20 | 34.00 | 48.70 | 71.90 | 73.30 | 53.10 | 33.60 | 23.00 | 15.30 | 11.30 | 10.20 | 8.00  | 8.60  | 8.30  | 9.10  | 12.10 | 20.30 | 27.20 | 32.20 | 42.10 | 44.20 | 37.30 | 23.90 | 15.10 | 11.30 |
| 2019–2020 Season |      |      |      |      |      |       |       |       |       |       |       |       |       |       |       |       |       |       |       |       |       |       |       |       |       |       |       |       |       |       |       |       |
| Week             | 41   | 42   | 43   | 44   | 45   | 46    | 47    | 48    | 49    | 50    | 51    | 52    | 1     | 2     | 3     | 4     | 5     | 6     | 7     | 8     | 9     | 10    | 11    | 12    | 13    | 14    | 15    | 16    | 17    | 18    | 19    | 20    |
| S-SDS            | 1.78 | 1.75 | 1.83 | 1.84 | 1.79 | 1.77  | 1.78  | 1.77  | 1.76  | 1.83  | 1.94  | 2.02  | 1.65  | 1.80  | 1.80  | 1.35  | 1.51  | 1.45  | 1.53  | 1.14  | 0.82  | 0.92  | 0.98  | 0.86  | 0.82  | 0.91  | 0.90  | 0.97  | 1.05  | 1.06  | 1.10  | 1.14  |
| ILI              | 4.20 | 4.6  | 4.50 | 5.80 | 7.00 | 8.20  | 9.70  | 12.70 | 19.50 | 28.50 | 37.80 | 49.80 | 49.10 | 47.80 | 42.40 | 40.90 | 28.00 | 16.40 | 11.60 | 8.50  | 6.30  | 3.90  | 2.90  | 3.20  | 2.80  | 2.50  | 2.70  | 2.30  | 2.40  | 1.70  | 2.10  | 2.30  |

S-SDS, subway use-based social distancing score; ILI, influenza-like illness.

**Table S2.** Weekly trend of Subway use-based social distancing score (S-SDS) and COVID-19 occurrence between weeks 5 of 2020 and 5 of 2021.

| 2020 year      |      |      |      |      |      |      |      |      |      |      |      |      |      |      |      |      |      |      |      |      |      |      |      |      |      |      |      |
|----------------|------|------|------|------|------|------|------|------|------|------|------|------|------|------|------|------|------|------|------|------|------|------|------|------|------|------|------|
| Week           | 5    | 6    | 7    | 8    | 9    | 10   | 11   | 12   | 13   | 14   | 15   | 16   | 17   | 18   | 19   | 20   | 21   | 22   | 23   | 24   | 25   | 26   | 27   | 28   | 29   | 30   |      |
| S-SDS          | 1.51 | 1.45 | 1.53 | 1.14 | 0.82 | 0.92 | 0.98 | 0.86 | 0.82 | 0.91 | 0.90 | 0.97 | 1.05 | 1.06 | 1.10 | 1.14 | 1.15 | 1.15 | 1.14 | 1.17 | 1.18 | 1.19 | 1.21 | 1.22 | 1.23 | 1.22 |      |
| COVID-19       | 5    | 5    | 2    | 315  | 2578 | 3832 | 1301 | 639  | 395  | 437  | 187  | 76   | 32   | 11   | 22   | 156  | 84   | 233  | 237  | 291  | 226  | 179  | 217  | 187  | 111  | 168  |      |
| 2020–2021 year |      |      |      |      |      |      |      |      |      |      |      |      |      |      |      |      |      |      |      |      |      |      |      |      |      |      |      |
| Week           | 31   | 32   | 33   | 34   | 35   | 36   | 37   | 38   | 39   | 40   | 41   | 42   | 43   | 44   | 45   | 46   | 47   | 48   | 49   | 50   | 51   | 52   | 1    | 2    | 3    | 4    | 5    |
| S-SDS          | 1.25 | 1.23 | 1.26 | 1.03 | 0.88 | 0.79 | 0.85 | 1.00 | 1.08 | 0.79 | 1.08 | 1.18 | 1.22 | 1.27 | 1.27 | 1.31 | 1.21 | 1.07 | 0.97 | 0.92 | 0.83 | 0.80 | 0.87 | 0.86 | 0.92 | 0.98 | 1.01 |
| COVID-19       | 69   | 101  | 392  | 1879 | 2317 | 1531 | 944  | 753  | 530  | 401  | 430  | 435  | 527  | 607  | 621  | 857  | 1790 | 2804 | 3415 | 4654 | 6644 | 7119 | 6519 | 5168 | 3621 | 2687 | 2969 |

S-SDS, subway use-based social distancing score.

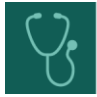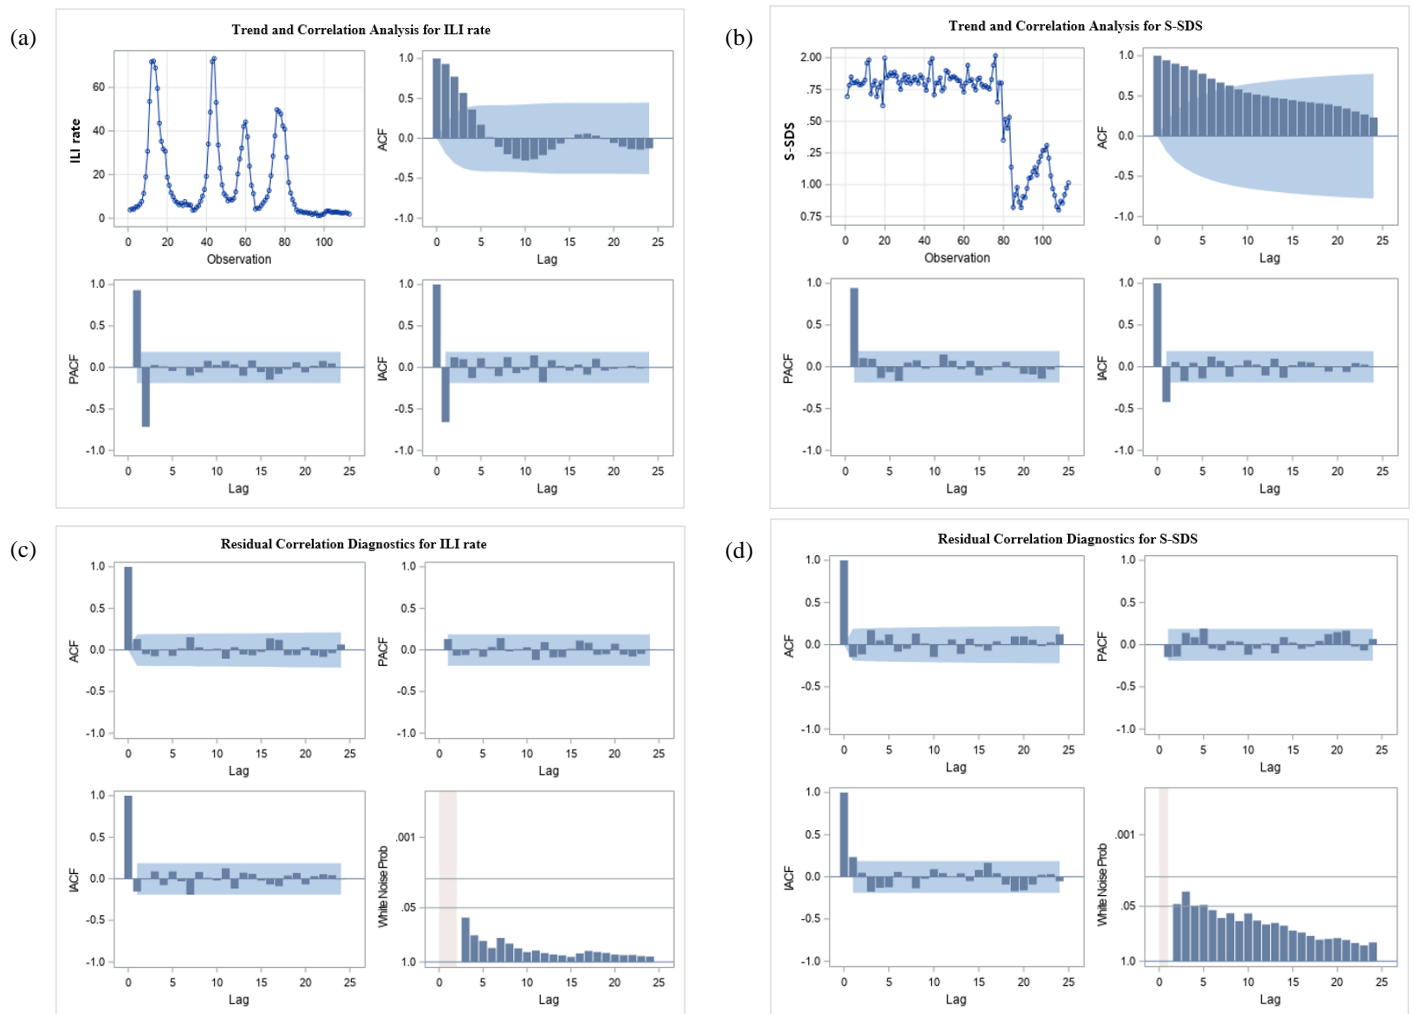

**Figure S1.** Trend and correlation analysis and residual correlation diagnostics of ILI rate and S-SDS are shown. (a) Trend and correlation analysis for ILI rate, (b) Trend and correlation analysis for S-SDS, (c) Residual correlation diagnostics for ILI rate, (d) Residual correlation diagnostics for S-SDS. ILI, influenza-like illness; S-SDS, subway use-based social distancing score.

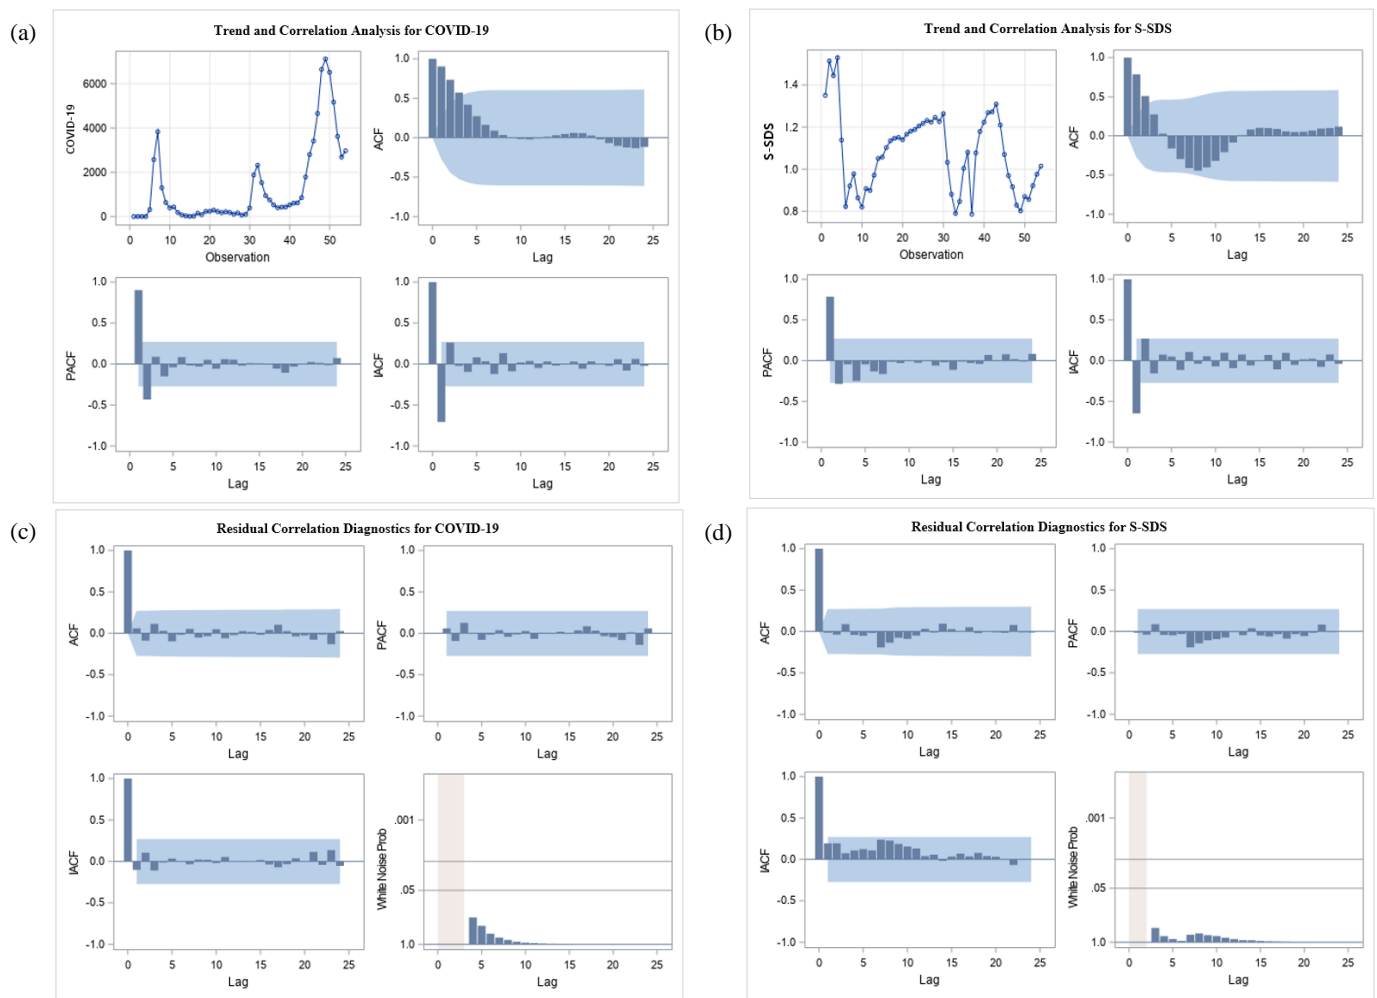

**Figure S2.** Trend and correlation analysis and residual correlation diagnostics of COVID-19 and SDS are shown. (a) Trend and correlation analysis for COVID-19, (b) Trend and correlation analysis for S-SDS, (c) Residual correlation diagnostics for COVID-19, (d) Residual correlation diagnostics for S-SDS. ILI, influenza-like illness; S-SDS, subway use-based social distancing score.

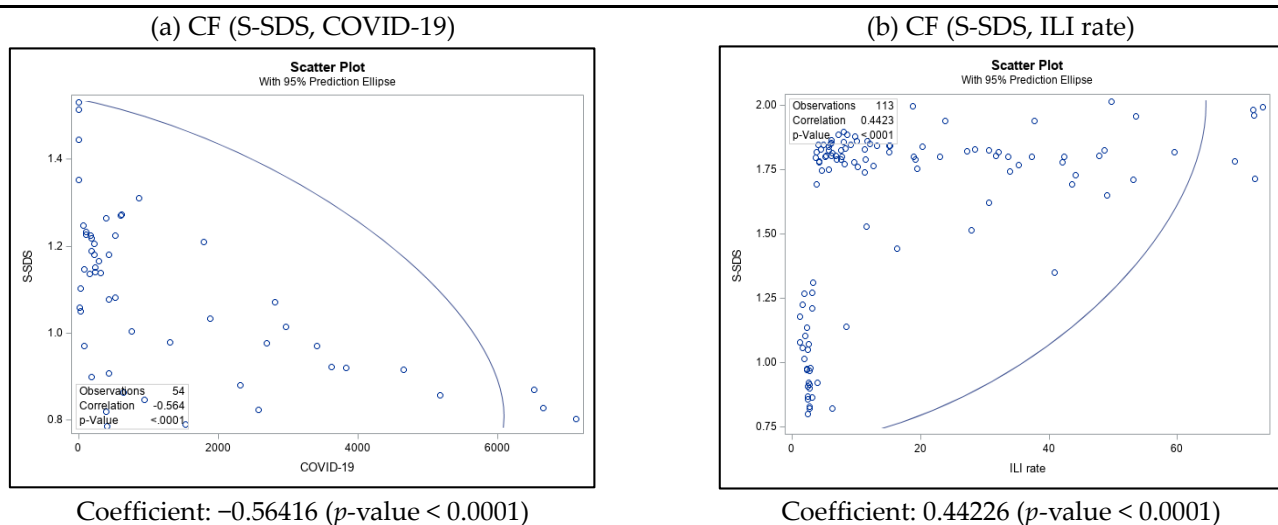

**Figure S3.** The plot of the correlation functions (CF). The plot of CF for (a) S-SDS and COVID-19; and (b) S-SDS and ILI rate. S-SDS, subway use-based social distancing score; COVID-19, coronavirus disease 2019; ILI, influenza-like illness.

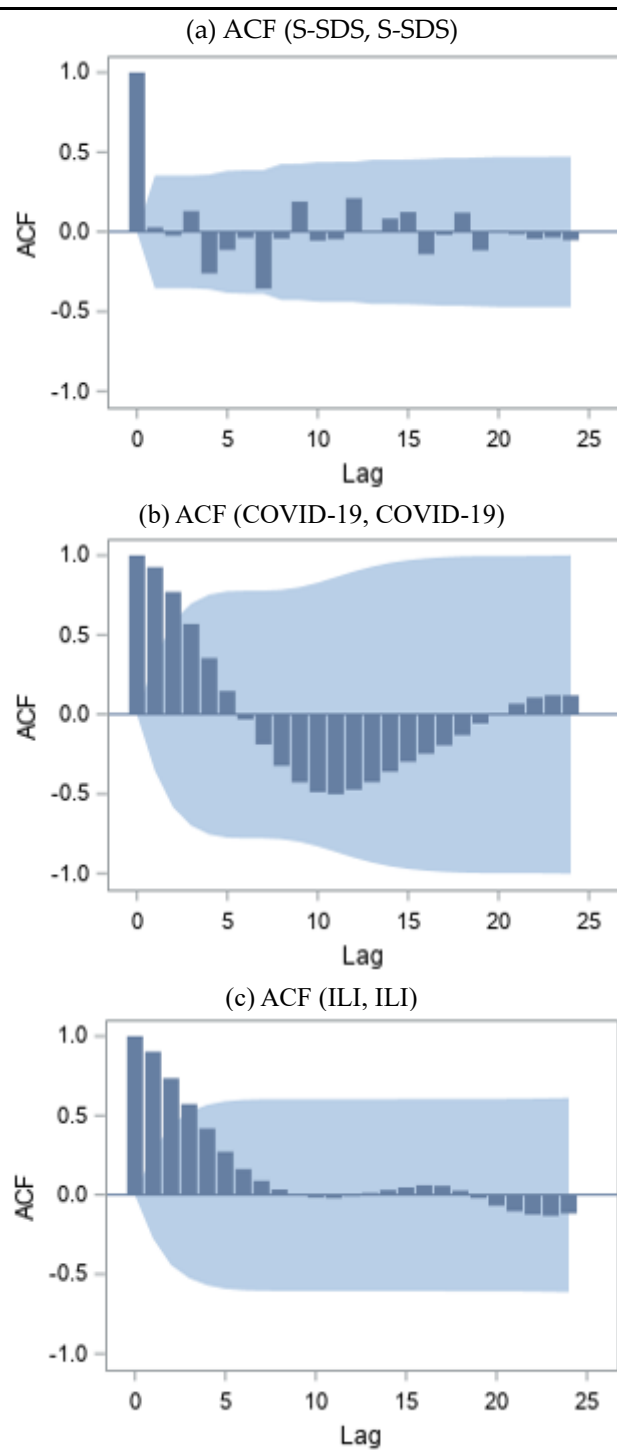

**Figure S4.** The plot of the autocorrelation functions (ACF) is presented. The plots of ACF for (a) S-SDS; (b) COVID-19; and (c) ILI rate. S-SDS, subway use-based social distancing score; COCID-19, coronavirus disease 2019; ILI, influenza-like illness.
